# Supplementary material
Source: publisher figshare collection journal article supplement (https://gsapubs.figshare.com/ndownloader/files/22746047)
Supplement: Supplementary file 1 [file 22746047]

## APPENDIX DR1: ALLUVIAL SURFACE AGE ESTIMATE

The incised alluvial surface, 5 km to 9 km from the mountains, has similar nuclide activities for samples CMT-5F, CMT-7F, and CMT-9F (Data repository, Table 1).

Similar nuclide activities, for the incised alluvial surface, suggest similar near-surface exposure histories, most likely a simultaneous depositional event that blanketed the piedmont from 5 to 9 km. Thus, we interpret the nuclide data as representing a common

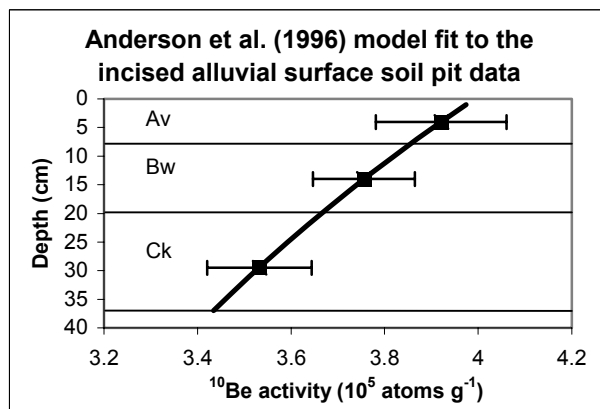

age for the entire alluvial surface.

There are two ways to estimate the age of the depositional surface 1) using a cosmogenic nuclide modeling approach (Anderson et al., 1996)

(shown at left) and 2) using established soil profile development

index techniques. The nuclide modeling approach (black line in graph) fits the data (black squares with error bars representing 1 sigma analytical error) well and suggests a surface age of 26 ky. The 26 ky age is approximately 20 ky older than an age suggested by the observed Av – Bw – Ck horization (based on Birkeland, 1999). The nuclide modeling most likely does not represent the surface age because sediment at different depths is sourced from different up gradient geomorphic units (Chemehuevi Mountains, Sawtooth Range, the pediment, and older fan deposits) and thus does not have a common nuclide inheritance, a requirement for the Anderson et al. (1996) model. Thus, based on weak soil development exposed in the 10 m long soil trench, moderate rock varnish, and moderate pavement development, we conclude that the incised alluvial surface of the

Chemehuevi Mountain piedmont is probably mid-Holocene when compared to other dated soils in the Mojave Desert (Harden et al., 1991; McDonald, 1994; McFadden and McAuliffe, 1997). A soil pre-dating the Holocene in the Mojave Desert would exhibit stronger soil development. Since the surface has uniform nuclide activities (5 to 10 km), we use 5 ky as the age of the entire (4 km wide by 5 km long) incised surface. This age estimate is probably only accurate to within several 10s of percent, but is more accurate than nuclide based age estimate.

#### References:

- Anderson, R.S., Repka, J.L., and Dick, G.S., 1996, Explicit treatment of inheritance in dating depositional surfaces using in situ  $^{10}\text{Be}$  and  $^{26}\text{Al}$ : *Geology*, v. 24, p. 47-51.
- Birkeland, P.W., 1999, *Soils and geomorphology*: New York, Oxford University Press, 372 p.
- Harden, J.W., Taylor, E.M., McFadden, L.D., and Reheis, M.C., 1991, Calcic, gypsic, and siliceous soil chronosequences in arid and semiarid environments, *in* Nettleton, W.D., ed., *Occurrence, characteristics, and genesis of carbonate, gypsum, and silica accumulations in soils*, Volume 26, Soil Science Society of America, Madison, WI, p. 1-16.
- McDonald, E.V., 1994, The relative influence of climatic change, desert dust, and lithological control on soil geomorphic processes and hydrology of calcic soils formed on Quaternary alluvial-fan deposits in the Mojave Desert, California [Ph.D. thesis]: Albuquerque, University of New Mexico.

McFadden, L.D., and McAuliffe, J.R., 1997, Lithologically influenced geomorphic responses to Holocene climatic changes in the southern Colorado Plateau, Arizona; a soil-geomorphic and ecologic perspective: *Geomorphology*, v. 19, p. 303-332.

TABLE DR1. COSMOGENIC NUCLIDE ACTIVITIES, CHEMEHUEVI MOUNTAIN PIEDMONT

| Sample*                                      | Elevation <sup>†</sup><br>(m) | Northing <sup>§</sup><br>(m) | Easting <sup>§</sup><br>(m) | $^{10}\text{Be}^{\#}$<br>$(10^6 \text{ atoms g}^{-1})$ | $^{26}\text{Al}^{\#}$ | $^{26}\text{Al}:^{10}\text{Be}$ | Area**<br>(km <sup>2</sup> ) |
|----------------------------------------------|-------------------------------|------------------------------|-----------------------------|--------------------------------------------------------|-----------------------|---------------------------------|------------------------------|
| <u>Amalgamated basin samples</u>             |                               |                              |                             |                                                        |                       |                                 |                              |
| CMV-123                                      | 790                           | 3832763                      | 718571                      | 0.132 ± 0.004                                          | 0.82 ± 0.054          | 6.22 ± 0.46                     | 0.4                          |
|                                              |                               | 3832571                      | 718796                      |                                                        |                       |                                 |                              |
|                                              |                               | 3832263                      | 718885                      |                                                        |                       |                                 |                              |
| CMV-456                                      | 790                           | 3831700                      | 719904                      | 0.128 ± 0.004                                          | 0.82 ± 0.051          | 6.40 ± 0.45                     | 1.1                          |
|                                              |                               | 3831491                      | 719954                      |                                                        |                       |                                 |                              |
|                                              |                               | 3831059                      | 720463                      |                                                        |                       |                                 |                              |
| SRV-123                                      | 590                           | 3828280                      | 716955                      | 0.462 ± 0.018                                          | 2.71 ± 0.160          | 5.87 ± 0.42                     | 1.5                          |
|                                              |                               | 3830310                      | 716253                      |                                                        |                       |                                 |                              |
|                                              |                               | 3830057                      | 716353                      |                                                        |                       |                                 |                              |
| <u>Amalgamated bedrock samples</u>           |                               |                              |                             |                                                        |                       |                                 |                              |
| CMT-1B                                       | 670                           | 3829529                      | 720542                      | 0.216 ± 0.007                                          | 1.25 ± 0.061          | 5.78 ± 0.34                     | 6                            |
|                                              |                               | 3832482                      | 717860                      |                                                        |                       |                                 |                              |
| CMT-3B                                       | 600                           | 3828156                      | 719046                      | 0.381 ± 0.011                                          | 2.16 ± 0.134          | 5.67 ± 0.39                     | 4                            |
|                                              |                               | 3821125                      | 716328                      |                                                        |                       |                                 |                              |
| <u>Amalgamated colluvium samples</u>         |                               |                              |                             |                                                        |                       |                                 |                              |
| CMT-1S                                       | 670                           | 3829529                      | 720542                      | 0.287 ± 0.034                                          | 1.32 ± 0.074          | 4.60 ± 0.61                     | 2                            |
|                                              |                               | 3832482                      | 717860                      |                                                        |                       |                                 |                              |
| CMT-3H                                       | 600                           | 3828156                      | 719046                      | 0.546 ± 0.017                                          | 3.21 ± 0.154          | 5.88 ± 0.34                     | 4                            |
|                                              |                               | 3821125                      | 716328                      |                                                        |                       |                                 |                              |
| <u>Amalgamated ephemeral channel samples</u> |                               |                              |                             |                                                        |                       |                                 |                              |
| CMT-1C                                       | 670                           | 3829529                      | 720542                      | 0.195 ± 0.005                                          | 1.16 ± 0.072          | 5.92 ± 0.41                     |                              |
|                                              |                               | 3832482                      | 717860                      |                                                        |                       |                                 |                              |

|                                                 |     |         |        |                   |                  |                 |
|-------------------------------------------------|-----|---------|--------|-------------------|------------------|-----------------|
| CMT-3C                                          | 600 | 3828156 | 719046 | $0.217 \pm 0.006$ | $1.30 \pm 0.067$ | $6.03 \pm 0.36$ |
|                                                 |     | 3821125 | 716328 |                   |                  |                 |
| CMT-5C                                          | 550 | 3826824 | 717558 | $0.275 \pm 0.008$ | $1.83 \pm 0.123$ | $6.66 \pm .049$ |
|                                                 |     | 3829774 | 714858 |                   |                  |                 |
| CMT-7C                                          | 500 | 3825471 | 716069 | $0.381 \pm 0.011$ | $2.38 \pm 0.114$ | $6.25 \pm 0.35$ |
|                                                 |     | 3828427 | 713399 |                   |                  |                 |
| CMT-9C                                          | 470 | 3824108 | 714583 | $0.395 \pm 0.010$ | $2.43 \pm 0.124$ | $6.13 \pm 0.35$ |
|                                                 |     | 3827076 | 711926 |                   |                  |                 |
| CMT-12C                                         | 430 | 3822084 | 712374 | $0.471 \pm 0.015$ | $2.74 \pm 0.130$ | $5.81 \pm 0.33$ |
|                                                 |     | 3825029 | 709667 |                   |                  |                 |
| <u>Amalgamated incised alluvial fan samples</u> |     |         |        |                   |                  |                 |
| CMT-5F                                          | 550 | 3826824 | 717558 | $0.455 \pm 0.011$ | $2.58 \pm 0.121$ | $5.67 \pm 0.30$ |
|                                                 |     | 3829774 | 714858 |                   |                  |                 |
| CMT-7F                                          | 500 | 3825471 | 716069 | $0.434 \pm 0.012$ | $2.65 \pm 0.127$ | $6.09 \pm 0.34$ |
|                                                 |     | 3828427 | 713399 |                   |                  |                 |
| CMT-9F                                          | 470 | 3824108 | 714583 | $0.430 \pm 0.011$ | $2.47 \pm 0.116$ | $5.75 \pm 0.31$ |
|                                                 |     | 3827076 | 711926 |                   |                  |                 |
| CMT-12F                                         | 430 | 3822084 | 712374 | $0.497 \pm 0.013$ | $2.97 \pm 0.162$ | $5.99 \pm 0.36$ |
|                                                 |     | 3825029 | 709667 |                   |                  |                 |
| <u>Depth profile samples</u>                    |     |         |        |                   |                  |                 |
| CP1 0-8                                         | 520 | 3826877 | 715949 | $0.392 \pm 0.014$ | $2.48 \pm 0.146$ | $6.32 \pm 0.44$ |
| CP1 8-20                                        |     |         |        | $0.376 \pm 0.011$ | $2.35 \pm 0.112$ | $6.27 \pm 0.35$ |
| CP1 20-39                                       |     |         |        | $0.353 \pm 0.011$ | $2.27 \pm 0.108$ | $6.42 \pm 0.37$ |

---

Note: \*CM = Chemehuevi Mountain, V = valley sample, triple numbers after V indicate amalgamation of three valley samples, SR = Sawtooth Range, T = transect sample, single number after T indicates distance from the mountain front, B = bedrock, S and H = colluvium, C = channel sediment, F = terrace sediment, CP1 = soil pit samples with depth ranges listed in centimeters.

<sup>†</sup>Elevations are determined by hypsometric average elevations for mountain valleys and average elevations for transects.

<sup>§</sup>Northing and Easting values are NAD 27 zone 11S UTM datum. Coordinates are listed for all valley samples. Endpoint coordinates are listed for transect samples.

<sup>#10</sup>Be and <sup>26</sup>Al error is counting statistics from AMS with 2% uncertainty for stable Be and 4% uncertainty for stable Al, combined quadratically.

**\*\*Area of bedrock sediment source.** Basin areas are calculated for the 4 km transect length. Bedrock and colluvium are areas represent total area within 8 km section of pediment (2 km long by 4 km wide).

---

TABLE DR2. INCISED ALLUVIAL CHANNEL VOLUMES

| Transect       | Number of channels* | Average width | Average depth <sup>†</sup> | Total Channel<br>volume <sup>§</sup> |
|----------------|---------------------|---------------|----------------------------|--------------------------------------|
|                |                     | (m)           | (m)                        | (10 <sup>5</sup> m <sup>3</sup> )    |
| 5              | 42                  | 7.8           | 1.5                        | 5.0                                  |
| 6              | 89                  | 6.7           | 1.2                        | 7.5                                  |
| 7 <sup>#</sup> | 131                 | 3.8           | 1.2                        | 6.0                                  |
| 8 <sup>#</sup> | 170                 | 2.9           | 0.8                        | 4.0                                  |
| 9              | 229                 | 2.0           | 0.4                        | 1.8                                  |
| 10             | 263                 | 1.8           | 0                          | 0                                    |
| 11             | 284                 | 1.6           | 0                          | 0                                    |
| 12             | 308                 | 1.5           | 0                          | 0                                    |

\*Number of channels counted along 4 km transects.

<sup>†</sup>Weighted average depth of through going channels and channels that form on alluvial surface. Depth = 0 for transects 10 – 12 because entire surface is reworked.

<sup>§</sup>Length is assumed as 1000 m, the distance between transects.

<sup>#</sup>All data for transects 7 and 8 are linearly extrapolated from the other data.

TABLE DR3. COSMOGENIC NUCLIDE ACTIVITIES OF CHANNEL SEDIMENT BASED ON MASS BALANCE

| Distance<br>(km) | Geomorphic<br>unit*   | Mass added <sup>†</sup><br>(kg y <sup>-1</sup> ) | Percent of channel<br>sediment mass <sup>§</sup> | Nuclide activity of<br>channel sediment<br>(10 <sup>5</sup> atoms g <sup>-1</sup> ) | Modeled nuclide<br>activity <sup>#</sup><br>(10 <sup>5</sup> atoms g <sup>-1</sup> ) | Percent difference |
|------------------|-----------------------|--------------------------------------------------|--------------------------------------------------|-------------------------------------------------------------------------------------|--------------------------------------------------------------------------------------|--------------------|
| 0                | Chemehuevi basins     | 162000                                           | 100%                                             | 1.30                                                                                | 1.30                                                                                 | 0%                 |
| 2                | Bedrock and colluvium | 432000                                           | 73%                                              | 1.95                                                                                | 2.06                                                                                 | 5%                 |
| 4                | Bedrock and colluvium | 194000                                           | 25%                                              | 2.17                                                                                | 2.70                                                                                 | 24%                |
| 5                | Sawtooth Range        | 50800                                            | 6%                                               | 2.75                                                                                | 2.83                                                                                 | 3%                 |
| 7                | Incised alluvium      | 390000                                           | 32%                                              | 3.81                                                                                | 3.46                                                                                 | -9%                |
| 9                | Incised alluvium      | 310000                                           | 20%                                              | 3.95                                                                                | 3.74                                                                                 | -5%                |
| 12               | Incised alluvium      | 58600                                            | 4%                                               | 4.71                                                                                | 4.72                                                                                 | 0%                 |

Note: \*Geomorphic unit of sediment source. Bedrock and colluvium pediment sources are combined.

<sup>†</sup> Mass added from each geomorphic unit based on nuclide models for source basins and the pediment, and based on channel dimensions and surface age for the incised alluvium.

<sup>§</sup>Percent that the added mass represents when added to the channel sediment.

<sup>#</sup>Modeled nuclide activity based on weighting the sediment mass flux from each geomorphic unit by the <sup>10</sup>Be activity and adding nuclide dosing during sediment transport.
